# Supplementary material for: EGFR Downregulation after Anti-EGFR Therapy Predicts the Antitumor Effect in Colorectal Cancer
Source: Oxford University Press journal article supplement (doi:10.1158/1541-7786.mcr-16-0383), 2017-07-11
Supplement: 15417786mcr160383-sup-173397_3_supp_4136709_qsgc6h.xlsx [file 15417786mcr160383-sup-173397_3_supp_4136709_qsgc6h.xlsx]

## Sheet: Sheet1
Supplementary Table S3 The relationship between EGFR downregulation
and early tumor shrinkage
	Patient	No change (%)	Moderate decrease(%)	Marked decrease(%)
ETS	3	0 (0)	2(66)	1 (33)
Non-ETS	10	7 (70)	3 (30)	0 (0)
