# Supplementary material for: EGFR Downregulation after Anti-EGFR Therapy Predicts the Antitumor Effect in Colorectal Cancer
Source: Oxford University Press journal article supplement (doi:10.1158/1541-7786.mcr-16-0383), 2017-07-11
Supplement: 15417786mcr160383-sup-173397_3_supp_4136710_ksgc6h.xlsx [file 15417786mcr160383-sup-173397_3_supp_4136710_ksgc6h.xlsx]

## Sheet: Sheet1
Supplementary Table S2 The genetic alteration of colorectal cancer cell lines
Cell line	KRAS				BRAF	NRAS			PIK3CA	EGFR
	codon12	13	61	146	600	12	13	61	1047
Caco-2	-	-	-	-	-	-	-	-	-	-
CCK-81	-	-	-	-	-	-	-	-	-	-
CoCM-1	-	-	-	-	-	-	-	-	-	-
COLO201	-	-			+
COLO205	-	-			+
COLO320DM	-	-	-	-	-	-	-	-	-	-
DLD-1	-	+			-
HCA-46	-	-	-	-	-	-	-	-	-	-
HCA-7	-	-	-	-	-	-	-	-	-	-
HCT116	-	+			-
HT29	-	-			+
HT55	-	-	-	-	-	-	-	-	-	-
JHCOLOYI	-	-	-	-	-	-	-	-	-	-
LIM1215	-	-	-	-	-	-	-	-	-	-
LS174T	+	-			-
M7609	+	-			-
OUMS-23	-	-			+
PMF-ko14	-	-	-	-	-	-	-	-	-	-
SW1417	-	-			+
SW48	-	-	-	-	-	-	-	-	-	+(ex.19 G719S)
SW480	-	-			-
T84	-	+			-
WiDr	-	-			+
