# Supplementary material for: EGFR Downregulation after Anti-EGFR Therapy Predicts the Antitumor Effect in Colorectal Cancer
Source: Oxford University Press journal article supplement (doi:10.1158/1541-7786.mcr-16-0383), 2017-07-11
Supplement: 15417786mcr160383-sup-173397_3_supp_4136720_bsgc6h.xlsx [file 15417786mcr160383-sup-173397_3_supp_4136720_bsgc6h.xlsx]

## Sheet: Sheet1
Supplementary Table S1 The colorectal cancer cell lines
and their culture conditions
Cell line	Medium	FBS(%)	CO2(%)
CoCM-1	RPMI1640/F12	10	5
COLO320DM	DMEM	10	5
CCK-81	EMEM	10	5
Caco-2	EMEM	20	5
HCA-7	DMEM	10	7.5
HCA-46	DMEM	10	7.5
LIM-1215	RPMI1640	10	5
HT55	EMEM	20	5
PMF-ko14	DMEM	10	5
JHCOLOYI	DMEM/F-12	10	5
HT-29	MoCoy's A5	10	5
DLD-1	RPMI1640	10	5
M7609	RPMI1640	10	5
WiDr	DMEM	10	5
OUMS-23	DMEM	10	5
COLO201	RPMI1640	10	5
SW480	Leibovitz's L15	10	0
LS174T	EMEM	10	5
HCT116	MoCoy's A5	10	5
COLO205	RPMI1640	10	5
SW48	Leibovitz's L15	10	0
T84	DMEM/F-12	10	5
SW1417	Leibovitz's L15	10	0
FBS: Fetal Bovine Serum (Gibco)
RPMI 1640/F-12: Roswell Park Memorial Institute 1640: Nutrient
Mixture F-12 (Sigma)
DMEM: Dulbecco's Modified Eagle Medium (Sigma)
EMEM: Eagle's Minimal Essential Medium (Sigma)
RPMI 1640: Roswell Park Memorial Institute 1640 (Sigma)
DMEM/F-12: Dulbecco's Modified Eagle Medium: Nutrient Mixture
F-12 (Sigma)
